# Supplementary material for: Initial high-resolution microscopic mapping of active and inactive regulatory sequences proves non-random 3D arrangements in chromatin domain clusters
Source: PubMed Central journal article supplement (PMC5547466; doi:10.1186/s13072-017-0146-0), 2017-08-07
Supplement: 13072_2017_146_MOESM7_ESM.pdf [file 13072_2017_146_MOESM7_ESM.pdf]

**A**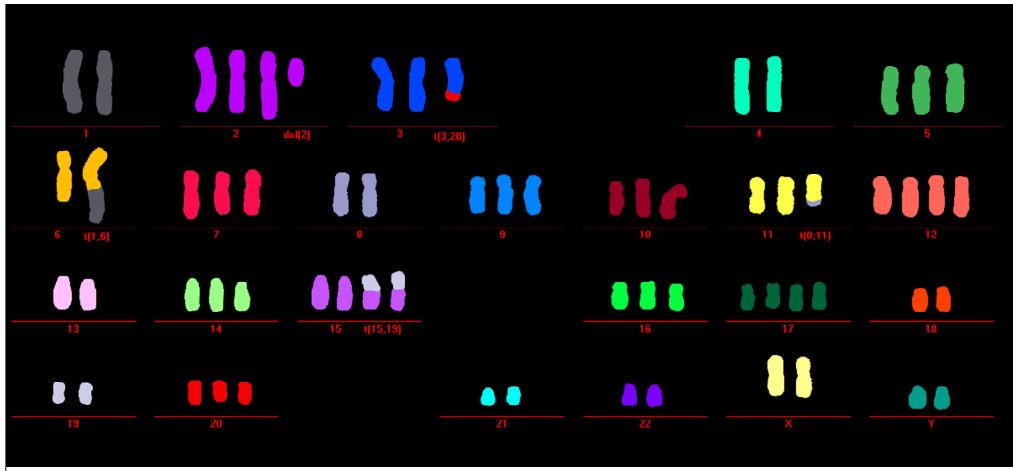**M-FISH: A549 adenocarcinoma cell line****B**

| Chromosome | Image 1<br>(n=64)           | Image 2<br>(n=63)           | Image 3<br>(n=64)           | Image 4<br>(n=64)           |
|------------|-----------------------------|-----------------------------|-----------------------------|-----------------------------|
| 1          | 1 x2                        | 1 x2                        | 1 x2                        | 1 x2                        |
| 2          | 2 x3<br><b>del(2q) x1</b>   | 2 x3<br><b>del(2q) x1</b>   | 2 x3<br><b>del(2q) x1</b>   | 2 x3<br><b>del(2q) x1</b>   |
| 3          | 3 x2<br><b>t(3; 20) x1</b>  | 3 x2<br><b>t(3; 20) x1</b>  | 3 x2<br><b>t(3; 20) x1</b>  | 3 x2<br><b>t(3; 20) x1</b>  |
| 4          | 4 x2                        | 4 x2                        | 4 x2                        | 4 x2                        |
| 5          | 5 x3                        | 5 x3                        | 5 x3                        | 5 x3                        |
| 6          | 6 x1<br><b>t(1;6) x1</b>    | 6 x1<br><b>t(1;6) x1</b>    | 6 x1<br><b>t(1;6) x1</b>    | 6 x1<br><b>t(1;6) x1</b>    |
| 7          | 7 x3                        | 7 x3                        | 7 x3                        | 7 x3                        |
| 8          | 8 x3                        | 8 x3                        | 8 x3                        | 8 x3                        |
| 9          | 9 x3                        | 9 x3                        | 9 x3                        | 9 x3                        |
| 10         | 10 x3                       | 10 x3                       | 10 x3                       | 10 x3                       |
| 11         | 11 x2<br><b>t(8;11) x1</b>  | 11 x2<br><b>t(8;11) x1</b>  | 11 x2<br><b>t(8;11) x1</b>  | 11 x2<br><b>t(8;11) x1</b>  |
| 12         | 12 x4                       | 12 x3                       | 12 x4                       | 12 x4                       |
| 13         | 13 x2                       | 13 x2                       | 13 x2                       | 13 x2                       |
| 14         | 14 x3                       | 14 x3                       | 14 x3                       | 14 x3                       |
| 15         | 15 x2<br><b>t(15;19) x2</b> | 15 x2<br><b>t(15;19) x2</b> | 15 x2<br><b>t(15;19) x2</b> | 15 x2<br><b>t(15;19) x2</b> |
| 16         | 16 x3                       | 16 x3                       | 16 x3                       | 16 x3                       |
| 17         | 17 x4                       | 17 x4                       | 17 x4                       | 17 x4                       |
| 18         | 18 x2                       | 18 x2                       | 18 x2                       | 18 x2                       |
| 19         | 19 x2                       | 19 x2                       | 19 x2                       | 19 x2                       |
| 20         | 20 x2                       | 20 x3                       | 20 x3                       | 20 x2                       |
| 21         | 21 x2                       | 21 x2                       | 21 x2                       | 21 x2                       |
| 22         | 22 x1                       | 22 x2                       | 22 x2                       | 22 x2                       |
| X          | X x2                        | X x1                        | X x2                        | X x2                        |
| Y          | Y x1                        | Y x1                        | -                           | Y x1                        |

| Chromosome | Image 5<br>(n=62)           | Image 6<br>(n=63)           | Image 7<br>(n=63)           | Image 8<br>(n=63)           |
|------------|-----------------------------|-----------------------------|-----------------------------|-----------------------------|
| 1          | 1 x2                        | 1 x2                        | 1 x2                        | 1 x2                        |
| 2          | 2 x3<br><b>del(2q) x1</b>   | 2 x3<br><b>del(2q) x1</b>   | 2 x3<br><b>del(2q) x1</b>   | 2 x3<br><b>del(2q) x1</b>   |
| 3          | 3 x2<br><b>t(3;20) x1</b>   | 3 x2<br><b>t(3;20) x1</b>   | 3 x2<br><b>t(3;20) x1</b>   | 3 x2<br><b>t(3;20) x1</b>   |
| 4          | 4 x2                        | 4 x2                        | 4 x2                        | 4 x2                        |
| 5          | 5 x3                        | 5 x3                        | 5 x3                        | 5 x3                        |
| 6          | 6 x1<br>-                   | 6 x1<br><b>t(1;6) x1</b>    | 6 x1<br><b>t(1;6) x1</b>    | 6 x1<br><b>t(1;6) x1</b>    |
| 7          | 7 x3                        | 7 x3                        | 7 x3                        | 7 x2                        |
| 8          | 8 x3                        | 8 x3                        | 8 x3                        | 8 x3                        |
| 9          | 9 x3                        | 9 x3                        | 9 x3                        | 9 x2<br>del(9q) x1          |
| 10         | 10 x3                       | 10 x3                       | 10 x3                       | 10 x3                       |
| 11         | 11 x2<br><b>t(8;11) x1</b>  | 11 x2<br><b>t(8;11) x1</b>  | 11 x2<br><b>t(8;11) x1</b>  | 11 x2<br><b>t(8;11) x2</b>  |
| 12         | 12 x2                       | 12 x3                       | 12 x3                       | 12 x3                       |
| 13         | 13 x2                       | 13 x2                       | 13 x2                       | 13 x2                       |
| 14         | 14 x3                       | 14 x3                       | 14 x3                       | 14 x3                       |
| 15         | 15 x2<br><b>t(15;19) x2</b> | 15 x2<br><b>t(15;19) x2</b> | 15 x2<br><b>t(15;19) x2</b> | 15 x2<br><b>t(15;19) x2</b> |
| 16         | 16 x2                       | 16 x3                       | 16 x3                       | 16 x3                       |
| 17         | 17 x4                       | 17 x4                       | 17 x4                       | 17 x4                       |
| 18         | 18 x2                       | 18 x2                       | 18 x2                       | 18 x2                       |
| 19         | 19 x2                       | 19 x1                       | 19 x2                       | 19 x1                       |
| 20         | 20 x3                       | 20 x3                       | 20 x3                       | 20 x3                       |
| 21         | 21 x2                       | 21 x2                       | 21 x2                       | 21 x2                       |
| 22         | 22 x2                       | 22 x2                       | 22 x2                       | 22 x2                       |
| X          | X x2                        | X x2                        | X x1                        | X x2                        |
| Y          | Y x2                        | Y x1                        | Y x1                        | Y x1                        |

| Chromosome | Image 9<br>(n=66)           | Image 10<br>(n=66)          | Image 11<br>(n=65)          | Image 12<br>(n=66)          |
|------------|-----------------------------|-----------------------------|-----------------------------|-----------------------------|
| 1          | 1 x2                        | 1 x2                        | 1 x2                        | 1 x2                        |
| 2          | 2 x3<br><b>del(2q) x1</b>   | 2 x3<br><b>del(2q) x1</b>   | 2 x3<br><b>del(2q) x1</b>   | 2 x3<br><b>del(2q) x1</b>   |
| 3          | 3 x2<br><b>t(3;20) x1</b>   | 3 x2<br><b>t(3;20) x1</b>   | 3 x2<br><b>t(3;20) x1</b>   | 3 x2<br><b>t(3;20) x1</b>   |
| 4          | 4 x2                        | 4 x2                        | 4 x2                        | 4 x1<br>t(Y;4) x1           |
| 5          | 5 x3                        | 5 x3                        | 5 x3                        | 5 x3                        |
| 6          | 6 x1<br><b>t(1;6) x1</b>    | 6 x1<br><b>t(1;6) x1</b>    | 6 x1<br><b>t(1;6) x1</b>    | 6 x1<br><b>t(1;6) x1</b>    |
| 7          | 7 x3                        | 7 x3                        | 7 x3                        | 7 x3                        |
| 8          | 8 x3                        | 8 x3                        | 8 x3                        | 8 x3                        |
| 9          | 9 x3                        | 9 x3                        | 9 x3                        | 9 x3                        |
| 10         | 10 x3                       | 10 x3                       | 10 x3                       | 10 x3                       |
| 11         | 11 x2<br><b>t(8;11) x1</b>  | 11 x2<br><b>t(8;11) x1</b>  | 11 x2<br><b>t(8;11) x1</b>  | 11 x2<br><b>t(8;11) x1</b>  |
| 12         | 12 x4                       | 12 x4                       | 12 x4                       | 12 x4                       |
| 13         | 13 x2                       | 13 x2                       | 13 x2                       | 13 x2                       |
| 14         | 14 x3                       | 14 x3                       | 14 x3                       | 14 x3                       |
| 15         | 15 x2<br><b>t(15;19) x2</b> | 15 x2<br><b>t(15;19) x2</b> | 15 x2<br><b>t(15;19) x2</b> | 15 x2<br><b>t(15;19) x2</b> |
| 16         | 16 x3                       | 16 x3                       | 16 x3                       | 16 x3                       |
| 17         | 17 x4                       | 17 x4                       | 17 x4                       | 17 x4                       |
| 18         | 18 x2                       | 18 x2                       | 18 x2                       | 18 x2                       |
| 19         | 19 x2                       | 19 x2                       | 19 x2                       | 19 x2                       |
| 20         | 20 x3                       | 20 x3                       | 20 x3                       | 20 x3                       |
| 21         | 21 x2                       | 21 x2                       | 21 x1                       | 21 x2                       |
| 22         | 22 x2                       | 22 x2                       | 22 x2                       | 22 x2                       |
| X          | X x2                        | X x2                        | X x2                        | X x2                        |
| Y          | Y x2                        | Y x2                        | Y x2                        | Y x1<br>del(Yq) x1          |

| <b>Chromosome</b> | <b>Image 13<br/>(n=64)</b>  | <b>Image 14<br/>(n=66)</b>  | <b>Image 15<br/>(n=65)</b>  | <b>Image 16<br/>(n=66)</b>  |
|-------------------|-----------------------------|-----------------------------|-----------------------------|-----------------------------|
| <b>1</b>          | 1 x2                        | 1 x2                        | 1 x2                        | 1 x2                        |
| <b>2</b>          | 2 x3<br><b>del(2q) x1</b>   | 2 x3<br><b>del(2q) x1</b>   | 2 x3<br><b>del(2q) x1</b>   | 2 x4<br><b>del(2q) x1</b>   |
| <b>3</b>          | 3 x2<br><b>t(3;20) x1</b>   | 3 x2<br><b>t(3;20) x1</b>   | 3 x2<br><b>t(3;20) x1</b>   | 3 x2<br><b>t(3;20) x1</b>   |
| <b>4</b>          | 4 x2                        | 4 x2                        | 4 x2                        | 4 x2                        |
| <b>5</b>          | 5 x3                        | 5 x3                        | 5 x3                        | 5 x3                        |
| <b>6</b>          | 6 x1<br><b>t(1;6) x1</b>    | 6 x2<br>-                   | 6 x1<br><b>t(1;6) x1</b>    | 6 x1<br><b>t(1;6) x1</b>    |
| <b>7</b>          | 7 x3                        | 7 x3                        | 7 x3                        | 7 x3                        |
| <b>8</b>          | 8 x3                        | 8 x3                        | 8 x3                        | 8 x3                        |
| <b>9</b>          | 9 x3                        | 9 x3                        | 9 x3                        | 9 x3                        |
| <b>10</b>         | 10 x3                       | 10 x3                       | 10 x3                       | 10 x3                       |
| <b>11</b>         | 11 x2<br><b>t(8;11) x1</b>  | 11 x2<br><b>t(8;11) x1</b>  | 11 x2<br><b>t(8;11) x1</b>  | 11 x2<br><b>t(8;11) x1</b>  |
| <b>12</b>         | 12 x3                       | 12 x4                       | 12 x4                       | 12 x4                       |
| <b>13</b>         | 13 x2                       | 13 x2                       | 13 x2                       | 13 x2                       |
| <b>14</b>         | 14 x3                       | 14 x3                       | 14 x3                       | 14 x3                       |
| <b>15</b>         | 15 x2<br><b>t(15;19) x2</b> | 15 x2<br><b>t(15;19) x2</b> | 15 x2<br><b>t(15;19) x2</b> | 15 x2<br><b>t(15;19) x2</b> |
| <b>16</b>         | 16 x3                       | 16 x3                       | 16 x3                       | 16 x3                       |
| <b>17</b>         | 17 x4                       | 17 x4                       | 17 x4                       | 17 x4                       |
| <b>18</b>         | 18 x2                       | 18 x2                       | 18 x2                       | 18 x2                       |
| <b>19</b>         | 19 x2                       | 19 x2                       | 19 x2                       | 19 x2                       |
| <b>20</b>         | 20 x3                       | 20 x3                       | 20 x3                       | 20 x3                       |
| <b>21</b>         | 21 x2                       | 21 x2                       | 21 x2                       | 21 x2                       |
| <b>22</b>         | 22 x2                       | 22 x2                       | 22 x2                       | 22 x2                       |
| <b>X</b>          | X x2                        | X x2                        | X x2                        | X x2                        |
| <b>Y</b>          | Y x1                        | Y x2                        | Y x1                        | Y x2                        |

| <b>Chromosome</b> | <b>Image 17<br/>(n=65)</b>  | <b>Image 18<br/>(n=65)</b>  | <b>Image 19<br/>(n=65)</b>  | <b>Image 20<br/>(n=66)</b>  |
|-------------------|-----------------------------|-----------------------------|-----------------------------|-----------------------------|
| <b>1</b>          | 1 x2                        | 1 x2                        | 1 x2                        | 1 x2                        |
| <b>2</b>          | 2 x3<br><b>del(2q) x1</b>   | 2 x3<br><b>del(2q) x1</b>   | 2 x3<br><b>del(2q) x1</b>   | 2 x3<br><b>del(2q) x1</b>   |
| <b>3</b>          | 3 x2<br><b>t(3;20) x1</b>   | 3 x2<br><b>t(3;20) x1</b>   | 3 x2<br><b>t(3;20) x1</b>   | 3 x2<br><b>t(3;20) x1</b>   |
| <b>4</b>          | 4 x2                        | 4 x2                        | 4 x2                        | 4 x2                        |
| <b>5</b>          | 5 x3                        | 5 x3                        | 5 x3                        | 5 x3                        |
| <b>6</b>          | 6 x1<br><b>t(1;6) x1</b>    | 6 x1<br><b>t(1;6) x1</b>    | 6 x1<br><b>t(1;6) x1</b>    | 6 x1<br><b>t(1;6) x1</b>    |
| <b>7</b>          | 7 x3                        | 7 x3                        | 7 x3                        | 7 x3                        |
| <b>8</b>          | 8 x3                        | 8 x3                        | 8 x3                        | 8 x3                        |
| <b>9</b>          | 9 x3                        | 9 x3                        | 9 x3                        | 9 x3                        |
| <b>10</b>         | 10 x3                       | 10 x3                       | 10 x3                       | 10 x3                       |
| <b>11</b>         | 11 x2<br><b>t(8;11) x1</b>  | 11 x2<br><b>t(8;11) x1</b>  | 11 x2<br><b>t(8;11) x1</b>  | 11 x2<br><b>t(8;11) x1</b>  |
| <b>12</b>         | 12 x3                       | 12 x3                       | 12 x4                       | 12 x4                       |
| <b>13</b>         | 13 x2                       | 13 x2                       | 13 x2                       | 13 x2                       |
| <b>14</b>         | 14 x3                       | 14 x3                       | 14 x3                       | 14 x3                       |
| <b>15</b>         | 15 x2<br><b>t(15;19) x2</b> | 15 x2<br><b>t(15;19) x2</b> | 15 x2<br><b>t(15;19) x2</b> | 15 x2<br><b>t(15;19) x2</b> |
| <b>16</b>         | 16 x3                       | 16 x3                       | 16 x3                       | 16 x3                       |
| <b>17</b>         | 17 x4                       | 17 x4                       | 17 x4                       | 17 x4                       |
| <b>18</b>         | 18 x2                       | 18 x2                       | 18 x2                       | 18 x2                       |
| <b>19</b>         | 19 x2                       | 19 x2                       | 19 x2                       | 19 x2                       |
| <b>20</b>         | 20 x3                       | 20 x3                       | 20 x3                       | 20 x3                       |
| <b>21</b>         | 21 x2                       | 21 x2                       | 21 x2                       | 21 x2                       |
| <b>22</b>         | 22 x2                       | 22 x2                       | 22 x2                       | 22 x2                       |
| <b>X</b>          | X x2                        | X x2                        | X x2                        | X x2                        |
| <b>Y</b>          | Y x2                        | Y x2                        | Y x1                        | Y x2                        |
