# Supplementary material for: Initial high-resolution microscopic mapping of active and inactive regulatory sequences proves non-random 3D arrangements in chromatin domain clusters
Source: PubMed Central journal article supplement (PMC5547466; doi:10.1186/s13072-017-0146-0), 2017-08-07
Supplement: 13072_2017_146_MOESM11_ESM.pdf [file 13072_2017_146_MOESM11_ESM.pdf]

| <b>BJ1</b>  | <p><b>DAPI vs fosmid pool 1 [DHS+]</b><br/> class 1 : &lt;0.001<br/> class 2 : 0.468<br/> class 3 : &lt;0.001<br/> class 4 : 0.062 (just above border)<br/> class 5 : 0.027<br/> class 6 : &lt;0.001<br/> class 7 : &lt;0.001</p> <p><b>DAPI vs fosmid pool 2 [DHS-]</b><br/> class 1 : &lt;0.001<br/> class 2 : &lt;0.001<br/> class 3 : &lt;0.001<br/> class 4 : 0.455<br/> class 5 : &lt;0.001<br/> class 6 : &lt;0.001<br/> class 7 : 0.168</p> <p><b>fosmid pool 1 [DHS+] vs fosmid pool 2 [DHS-]</b><br/> class 1 : 0.136<br/> class 2 : &lt;0.001<br/> class 3 : &lt;0.001<br/> class 4 : 0.506<br/> class 5 : &lt;0.001<br/> class 6 : &lt;0.001<br/> class 7 : 0.001</p> |
|-------------|-----------------------------------------------------------------------------------------------------------------------------------------------------------------------------------------------------------------------------------------------------------------------------------------------------------------------------------------------------------------------------------------------------------------------------------------------------------------------------------------------------------------------------------------------------------------------------------------------------------------------------------------------------------------------------------|
| <b>A549</b> | <p><b>DAPI vs fosmid pool 1 [DHS-]</b><br/> class 1 : 0.008<br/> class 2 : 0.032<br/> class 3 : 0.008<br/> class 4 : 0.008<br/> class 5 : 0.032<br/> class 6 : 0.690<br/> class 7 : 0.018</p> <p><b>DAPI vs fosmid pool 2 [DHS-]</b><br/> class 1 : 0.008<br/> class 2 : 0.056<br/> class 3 : 0.310<br/> class 4 : 0.151<br/> class 5 : 0.008<br/> class 6 : 0.421<br/> class 7 : 0.007</p> <p><b>fosmid pool 1 [DHS-] vs fosmid pool 2 [DHS-]</b><br/> class 1 : 0.841<br/> class 2 : 0.841<br/> class 3 : 0.032<br/> class 4 : 0.690<br/> class 5 : 0.222<br/> class 6 : 0.310<br/> class 7 : 0.424</p>                                                                         |
