# Supplementary material for: Initial high-resolution microscopic mapping of active and inactive regulatory sequences proves non-random 3D arrangements in chromatin domain clusters
Source: PubMed Central journal article supplement (PMC5547466; doi:10.1186/s13072-017-0146-0), 2017-08-07
Supplement: 13072_2017_146_MOESM18_ESM.pdf [file 13072_2017_146_MOESM18_ESM.pdf]

|                               |                                                                                                                                                                                                                                                                                                                                                                                                                                                                                                                                                                                                                                                                                                           |                                |                                                                                                                                                                                                                                                                                                                                                                                                                                                                                                                                                                                                 |
|-------------------------------|-----------------------------------------------------------------------------------------------------------------------------------------------------------------------------------------------------------------------------------------------------------------------------------------------------------------------------------------------------------------------------------------------------------------------------------------------------------------------------------------------------------------------------------------------------------------------------------------------------------------------------------------------------------------------------------------------------------|--------------------------------|-------------------------------------------------------------------------------------------------------------------------------------------------------------------------------------------------------------------------------------------------------------------------------------------------------------------------------------------------------------------------------------------------------------------------------------------------------------------------------------------------------------------------------------------------------------------------------------------------|
| <b>BJ1 6kb probes 1 and 2</b> | <p><b>DAPI vs probe1 [DHS+]</b><br/> class 1 : 0.164 (hints to extension into class1)<br/> class 2 : &lt;0.001<br/> class 3 : 0.989<br/> class 4 : &lt;0.001<br/> class 5 : &lt;0.001<br/> class 6 : &lt;0.001<br/> class 7 : &lt;0.001</p> <p><b>DAPI vs probe 2 [DHS-]</b><br/> class 1 : 0.017 (less extension into class 1)<br/> class 2 : 0.001<br/> class 3 : 0.989<br/> class 4 : 0.010<br/> class 5 : &lt;0.001<br/> class 6 : &lt;0.001<br/> class 7 : &lt;0.001</p> <p><b>probe 1 [DHS+] vs probe 2 [DHS-]</b><br/> class 1 : 0.490<br/> class 2 : 0.413<br/> class 3 : 1.000<br/> class 4 : 0.059<br/> class 5 : 0.988<br/> class 6 : 0.299<br/> class 7 : NA (not represented in class 7)</p> | <b>A549 6kb probes 1 and 2</b> | <p><b>DAPI vs probe1 [DHS-]</b><br/> class 1 : 0.005<br/> class 2 : 0.796<br/> class 3 : 0.007<br/> class 4 : 0.035<br/> class 5 : 0.393<br/> class 6 : 0.003<br/> class 7 : &lt;0.001</p> <p><b>DAPI vs probe 2 [DHS-]</b><br/> class 1 : 0.002<br/> class 2 : 0.023<br/> class 3 : 0.011<br/> class 4 : &lt;0.001<br/> class 5 : 0.853<br/> class 6 : &lt;0.001<br/> class 7 : &lt;0.001</p> <p><b>probe 1 [DHS-]vs probe 2 [DHS-]</b><br/> class 1 : 0.448<br/> class 2 : 0.579<br/> class 3 : 0.247<br/> class 4 : 0.165<br/> class 5 : 0.739<br/> class 6 : 0.825<br/> class 7 : 0.368</p> |
|-------------------------------|-----------------------------------------------------------------------------------------------------------------------------------------------------------------------------------------------------------------------------------------------------------------------------------------------------------------------------------------------------------------------------------------------------------------------------------------------------------------------------------------------------------------------------------------------------------------------------------------------------------------------------------------------------------------------------------------------------------|--------------------------------|-------------------------------------------------------------------------------------------------------------------------------------------------------------------------------------------------------------------------------------------------------------------------------------------------------------------------------------------------------------------------------------------------------------------------------------------------------------------------------------------------------------------------------------------------------------------------------------------------|
