# Supplementary material for: Initial high-resolution microscopic mapping of active and inactive regulatory sequences proves non-random 3D arrangements in chromatin domain clusters
Source: PubMed Central journal article supplement (PMC5547466; doi:10.1186/s13072-017-0146-0), 2017-08-07
Supplement: 13072_2017_146_MOESM19_ESM.pdf [file 13072_2017_146_MOESM19_ESM.pdf]

| <b>Fosmid ID<br/>(G248 library #)</b> | <b>Chr.<br/>position</b> | <b>Start (bp)</b> | <b>End (bp)</b> | <b>Length<br/>(kb)</b> | <b>full length<br/>of pair (kb)</b> |
|---------------------------------------|--------------------------|-------------------|-----------------|------------------------|-------------------------------------|
| G248P8092D1                           | 1p33.1                   | 56173094          | 56212987        | 39.9                   | 46.0                                |
| G248P89035F6                          | 1.p33.1                  | 56173094          | 56219121        | 42.9                   |                                     |
| G248P83004C6                          | 2p13.3                   | 67067250          | 67104909        | 37.7                   | 52.7                                |
| G248P82547F4                          | 2p13.3                   | 67084911          | 67120006        | 35.1                   |                                     |
| G248P87313E8                          | 2q37.3                   | 238290483         | 238330135       | 39.7                   | 42                                  |
| G248P85778F6                          | 2q37.3                   | 238293690         | 238332485       | 38.8                   |                                     |
| G248P8631F6                           | 3p13                     | 73639648          | 73680498        | 40.8                   | 43.3                                |
| G248P88483C3                          | 3p13                     | 73643931          | 73682963        | 39.0                   |                                     |
| G248P87150D8                          | 5q35.3                   | 178675290         | 178717726       | 42.4                   | 80                                  |
| G248P89650D7                          | 5q35.3                   | 178714697         | 178755396       | 40.7                   |                                     |
| G248P80020B11                         | 12q24.21                 | 114827219         | 114868439       | 41.2                   | 43.6                                |
| G248P8977D10                          | 12q24.21                 | 114825587         | 114869204       | 43.6                   |                                     |
|                                       |                          |                   |                 |                        |                                     |
| G248P83624H8                          | 3p22                     | 35204496          | 35241461        | 36.7                   | 37.5                                |
| G248P83627E4                          | 3p22                     | 35204498          | 35241974        | 37.5                   |                                     |
| G248P80223H2                          | 13q21.31                 | 69120342          | 69158436        | 38.1                   | 44.8                                |
| G248P84663H7                          | 13q21.31                 | 69123320          | 69165157        | 41.8                   |                                     |
